# Supplementary material for: Ce-doped three-dimensional graphite felt/PbO2 anode: single-step room-temperature electrodeposition and efficient electrocatalytic degradation of tetracycline
Source: Royal Society of Chemistry journal article supplement (doi:10.1039/d4nj01537a), 2024-01-01
Supplement: d4nj01537a1.pdf [file d4nj01537a1.pdf]

## Supplementary Information

### **Ce-doped three-dimensional graphite felt/PbO<sub>2</sub> anode: Single-step room-temperature electrodeposition and efficient electrocatalytic degradation of tetracycline**

Haolan Huang, Chao Zheng, Li Chen, Wenjing Tang, Xuefeng Zhang, Jiahao He,  
Yingchun Yang\*

*College of Resources and Environment, Chengdu University of Information  
Technology, Chengdu 610225, Sichuan, China*

\*Corresponding Author: yangyingchun@cuit.edu.cn (Y. Yang)

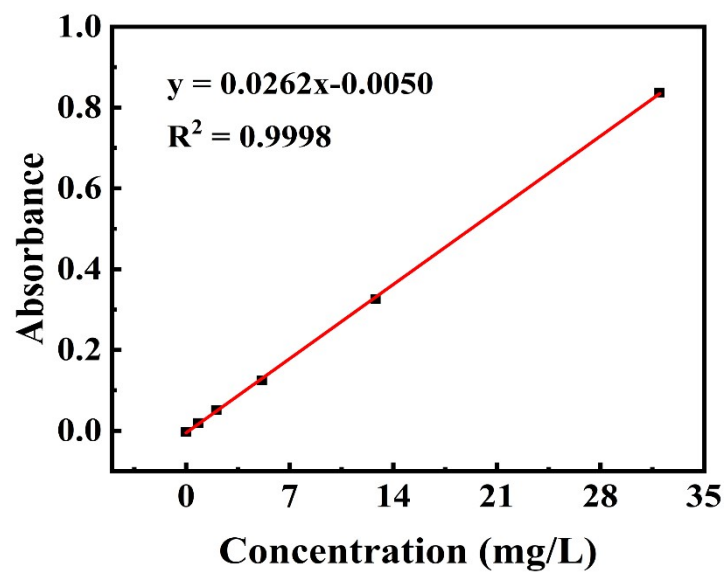

**Fig. S1.** The corresponding calibration curve used for calculation of TC concentration.

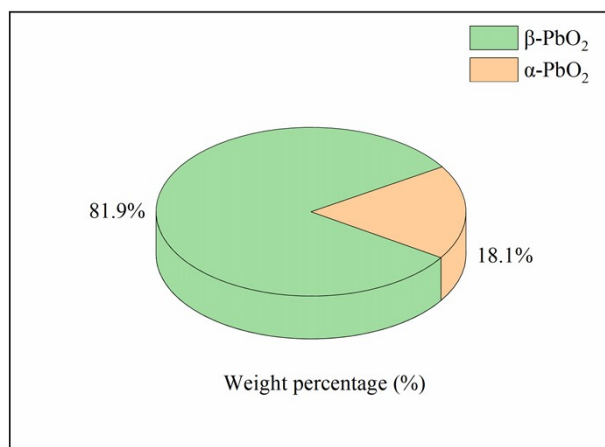

**Fig. S2.** Relative proportions of  $\alpha$ - and  $\beta$ -PbO<sub>2</sub> phases in the GF/PbO<sub>2</sub>-Ce electrode as determined by XRD analysis.

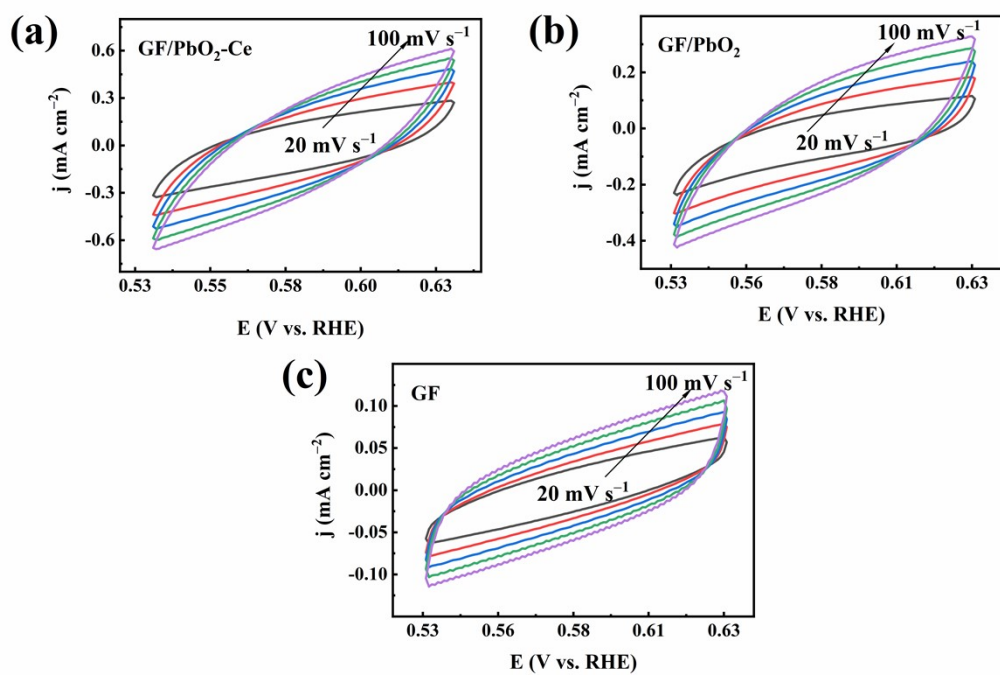

**Fig. S3.** CV curves of (a) GF/PbO<sub>2</sub>-Ce, (b) GF/PbO<sub>2</sub>, and (c) GF in 1 mol L<sup>-1</sup> Na<sub>2</sub>SO<sub>4</sub> solution.

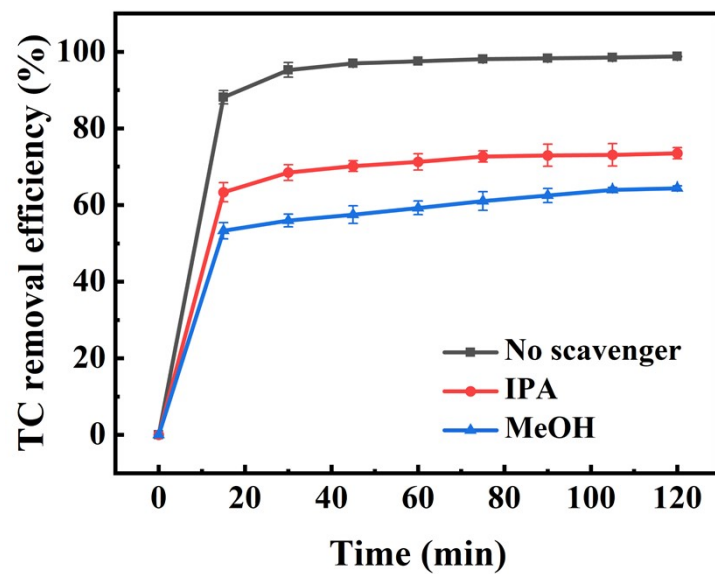

**Fig. S4.** The effect of quenchers on the removal rate of TC during the electrocatalytic degradation using the GF/PbO<sub>2</sub>-Ce electrode. (pH=3, TC=30 mg L<sup>-1</sup>, 7 mA cm<sup>-2</sup>, 0.04 mol L<sup>-1</sup> Na<sub>2</sub>SO<sub>4</sub>).

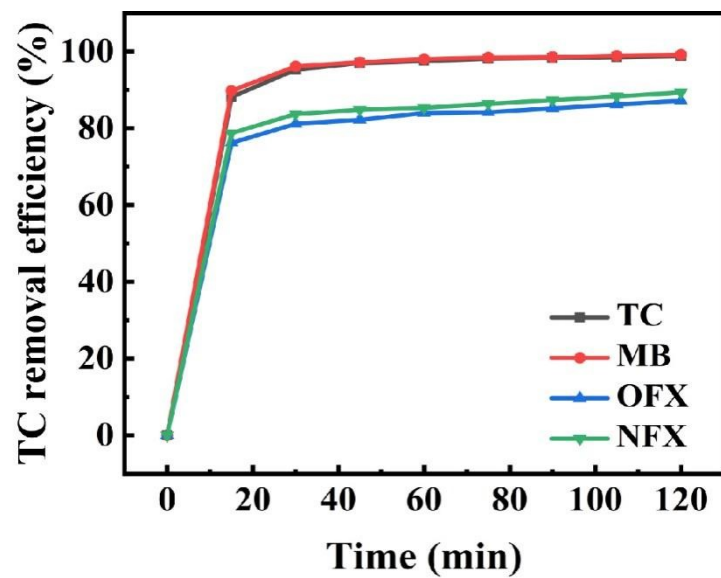

**Fig. S5.** Degradation curves of TC in contaminants. (pH=3, TC=30 mg L<sup>-1</sup>, 7 mA cm<sup>-2</sup>, 0.04 mol L<sup>-1</sup> Na<sub>2</sub>SO<sub>4</sub>).

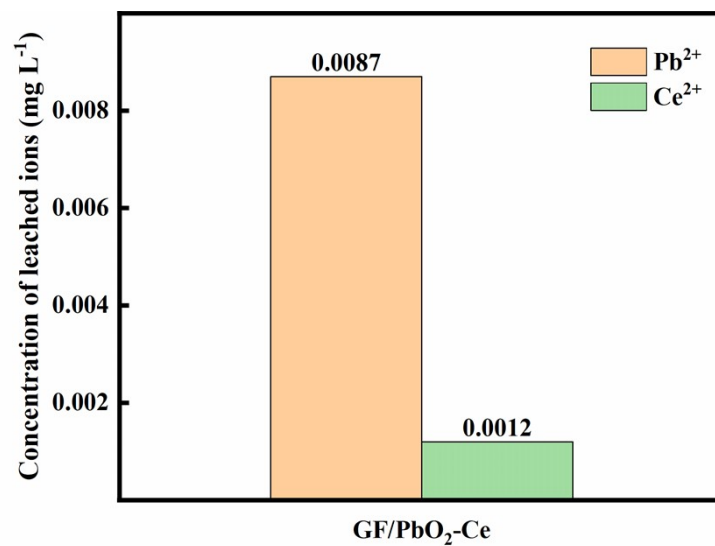

**Fig. S6** Leaching concentrations of Ce<sup>2+</sup> and Pb<sup>2+</sup> from GF/PbO<sub>2</sub>-Ce electrode after 120 minutes of electrocatalysis.

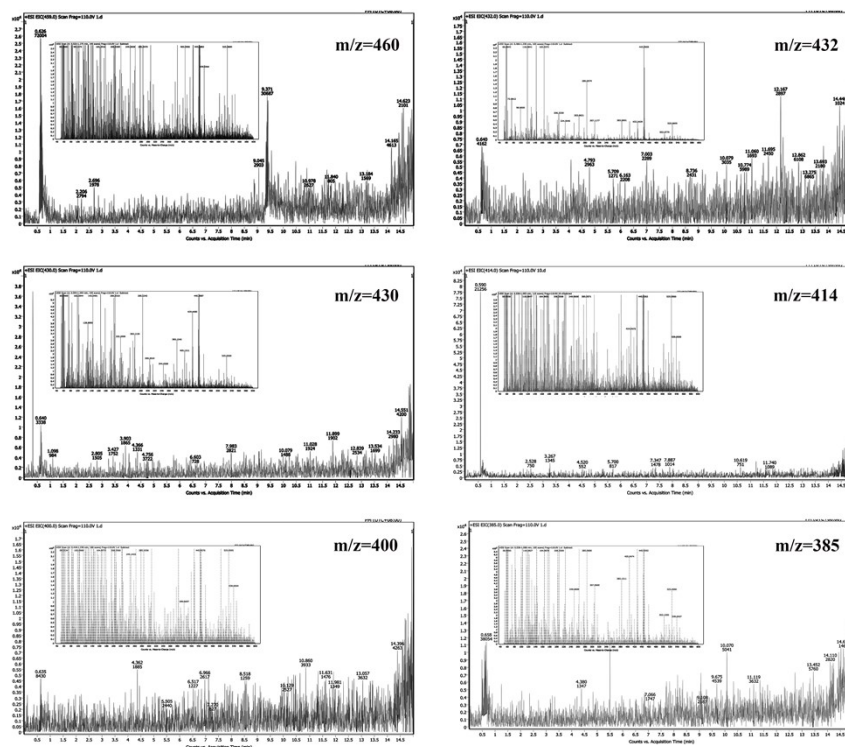

**Fig. S7** The results of HPLC-MS chromatographic of TC degradation products in the EIS (+) mode.



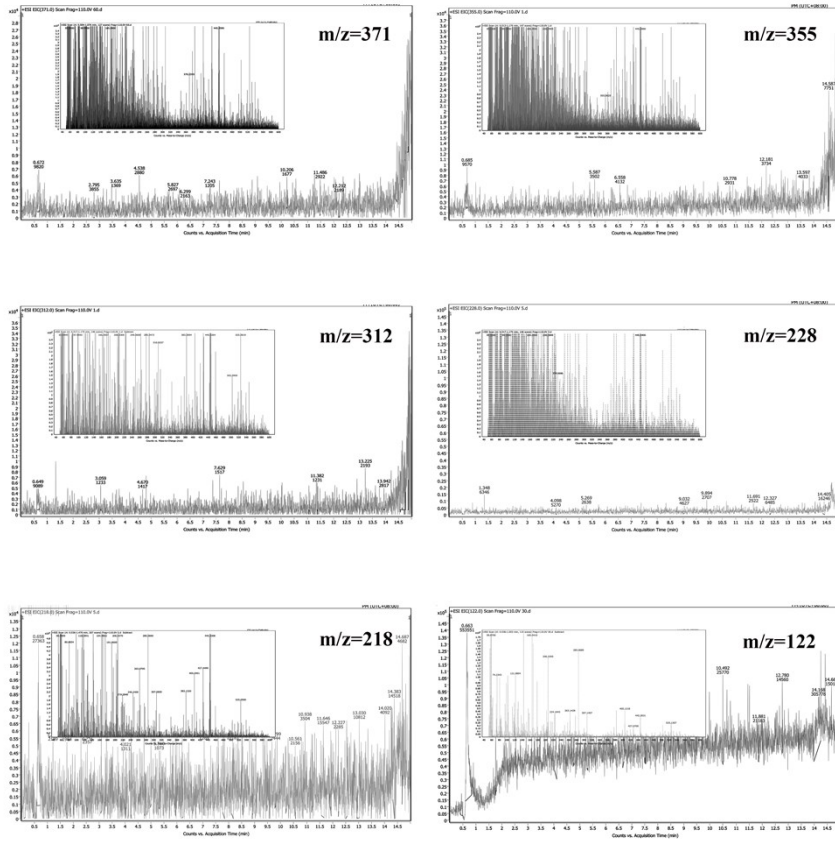

**Fig. S8** The results of HPLC-MS chromatographic of TC degradation products in the EIS (+) mode.

**Table S1** Evaluating electrocatalytic efficacy and durability relative to existing studies.

| Anodes                                                                       | Pollutants                                | Removal efficiency (%) | Stability               | Reference |
|------------------------------------------------------------------------------|-------------------------------------------|------------------------|-------------------------|-----------|
| GNP/PbO <sub>2</sub>                                                         | Enoxacin<br>(100 mg L <sup>-1</sup> )     | 92.69 (120 min)        | over 80%<br>(8 cycles)  | 1         |
| Ti/FeTiO <sub>3</sub> /Ce-<br>PbO <sub>2</sub>                               | Levofloxacin<br>(30 mg L <sup>-1</sup> )  | 95.00 (120 min)        | 92.29%<br>(10 cycles)   | 2         |
| GNPs/PbO <sub>2</sub>                                                        | Sulfadiazine<br>(50 mg L <sup>-1</sup> )  | 98.15 (120 min)        | over 90%<br>(10 cycles) | 3         |
| Pb/PbO <sub>2</sub>                                                          | Congo red<br>(20 mg L <sup>-1</sup> )     | 68.62% (20 min)        | 68.62%<br>(10 cycles)   | 4         |
| CNT-Ce-PbO <sub>2</sub>                                                      | m-nitrophenol<br>(50 mg L <sup>-1</sup> ) | 98.70% (120 min)       | /                       | 5         |
| 1.0-CNT-PbO <sub>2</sub>                                                     | Pyridine<br>(50 mg L <sup>-1</sup> )      | 93.8% (120 min)        | /                       | 6         |
| Iron/cobalt alloy<br>nanoparticles                                           | Tetracycline<br>(30 mg L <sup>-1</sup> )  | 100% (12 h)            | 97.55%<br>(10 cycles)   | 7         |
| Cu-doped<br>Fe@Fe <sub>2</sub> O <sub>3</sub><br>core-shell<br>nanoparticles | Tetracycline<br>(20 mg L <sup>-1</sup> )  | 98.1% (2 h)            | /                       | 8         |
| GF/PbO <sub>2</sub> -Ce                                                      | Tetracycline<br>(30 mg L <sup>-1</sup> )  | 98.75% (120 min)       | over 93%<br>(5 cycles)  | This work |

## References

- 1 J. Dai, H. Feng, K. Shi, X. Ma, Y. Yan, L. Ye and Y. Xia, *Chemosphere*, 2022, **307**, 135833.
- 2 G. Dong, L. Dong, K. Lang, D. Chai, D. Guo, J. Li, M. Zhao, S. Chen and W. Zhang, *J. Environ*, 2022, **10**, 108453.
- 3 Y. Yan, X. Ma, Y. Xia, H. Feng, S. Liu, C. He and Y. Ding, *Environ. Res*, 2023, **217**, 114778.
- 4 Z. Chen, G. Xie, Z. Pan, X. Zhou, W. Lai, L. Zheng and Y. Xu, *J. Alloys Compd.*, 2021, **851**, 156834.
- 5 X. Duan, Y. Zhao, W. Liu and L. Chang, *Arab. J. Chem.*, 2019, **12**, 709–717.
- 6 Z. Xu, H. Liu, J. Niu, Y. Zhou, C. Wang and Y. Wang, *J. Hazard. Mater.*, 2017, **327**, 144–152.
- 7 W. Xie, Y. Shi, Y. Wang, Y. Zheng, H. Liu, Q. Hu, S. Wei, H. Gu and Z. Guo, *Chem. Eng. J.*, 2021, **405**, 126585.
- 8 B. Huo, F. Meng, J. Yang, Y. Wang, J. Qi, W. Ma, Z. Wang, J. Wang and Z. Wang, *Chem. Eng. J.*, 2022, **436**, 135173.
